# Supplementary material for: Perceived Pain during Cataract Surgery with Topical Anesthesia: A Comparison between First-Eye and Second-Eye Surgery
Source: Hindawi journal article supplement (doi:10.1155/2015/383456), 2015-01-01
Supplement: f1 [file 383456.f1.pdf]

## Supplementary materials: Questionnaire 1 (Chinese Version)

### 复旦大学附属眼耳鼻喉科医院 白内障手术焦虑情况表

姓名\_\_\_\_\_ 性别\_\_\_\_\_ 年龄\_\_\_\_\_ 第\_\_眼手术 日期\_\_\_\_\_

#### 一、 SATI 简化问卷

|          | 没有 | 有一些 | 中等程度 | 很重 |
|----------|----|-----|------|----|
| 我觉得心情很平静 | 4  | 3   | 2    | 1  |
| 我觉得紧张    | 1  | 2   | 3    | 4  |
| 我觉得心烦意乱  | 1  | 2   | 3    | 4  |
| 我觉得很放松   | 4  | 3   | 2    | 1  |
| 我感到心满意足  | 4  | 3   | 2    | 1  |
| 我很担心     | 1  | 2   | 3    | 4  |

总分: \_\_\_\_\_

#### 二、 10 分视觉量表 (VAS)

我觉得我的紧张程度:

+-----+-----+-----+-----+-----+-----+-----+-----+-----+-----+  
0        1        2        3        4        5        6        7        8        9        10

客观指标:

血压: 术前\_\_\_\_\_/\_\_\_\_mmHg    术中\_\_\_\_\_/\_\_\_\_mmHg    术毕\_\_\_\_\_/\_\_\_\_mmHg

心率: 术前\_\_\_\_\_次/分    术中\_\_\_\_\_次/分    术毕\_\_\_\_\_次/分
